# Supplementary material for: Determinants of low socio-economic status and risk of Plasmodium vivax malaria infection in Panama (2009–2012): a case–control study
Source: Malar J. 2015 Jan 21;14:14. doi: 10.1186/s12936-014-0529-7 (PMC4320569; doi:10.1186/s12936-014-0529-7)
Supplement: Additional file 4: — Summary of malaria cases by gender and age group in Panama 2009–2012. [file 12936_2014_529_MOESM4_ESM.xlsx]

## Sheet: Sheet1
	Summary of malaria cases by gender and age group in Panama 2009-2012
		Gender
		Male	Female
	Age group (years)	No. Cases ( % )	No. Cases ( % )	Total Cases (%)
	< 5	171 (51)	164 (49)	335 (14.6)
	6 - 10	127 (30)	297 (70)	424 (18.5)
	11 - 15	128 (33.2)	257 (66.8)	385 (16.8)
	16 - 20	134 (62)	82 (38)	216 (9.4)
	21 - 25	113 (60.1)	75 (39.9)	188 (8.2)
	26 - 30	90 (57.3)	67 (42.7)	157 (6.8)
	31 - 35	70 (52.6)	63 (47.4)	133 (5.8)
	36 - 40	61 (57.5)	45 (42.5)	106 (4.6)
	41 - 45	62 (68.9)	28 (31.1)	90 (3.9)
	46 - 50	46 (55.4)	37 (44.6)	83 (3.6)
	51 - 55	28 (56)	22 (44)	50 (2.2)
	56 - 60	24 (77.4)	7 (22.6)	31 (1.3)
	61 -65	25 (58.1)	18 (41.9)	43 (1.9)
	66 - 70	12 (75)	4 (25)	16 (0.7)
	70 - 75	11 (50)	11 (50)	22 (0.9)
	> 75	6 (60)	4 (40)	10 (0.4)
	nd	3 (50)	3 (50)	6 (0.3)
	Total Cases	1111	1184	2295
	nd = not determine
